# Supplementary material for: Self-Assembly of Discrete Metallocycles versus Coordination Polymers Based on Cu(I) and Ag(I) Ions and Flexible Ligands: Structural Diversification and Luminescent Properties
Source: Polymers (Basel). 2016 Feb 15;8(2):46. doi: 10.3390/polym8020046 (PMC6432529; doi:10.3390/polym8020046)
Supplement: Supplementary file 1 [file polymers-08-00046-s001.pdf]

# Supplementary Materials: Self-Assembly of Discrete Metallocycles versus Coordination Polymers Based on Cu(I) and Ag(I) Ions and Flexible Ligands: Structural Diversification and Luminescent Properties

Javier Vallejos, Iván Brito, Alejandro Cárdenas, Michael Bolte, Sergio Conejeros, Pere Alemany and Jaime Llanos

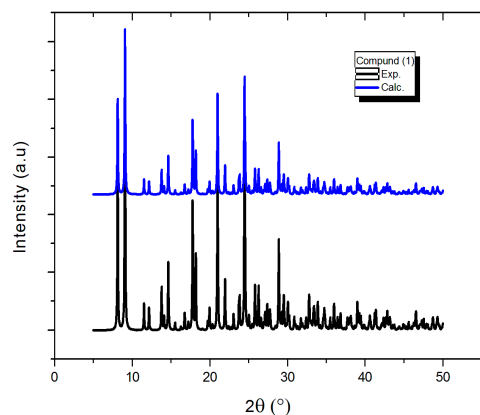

Figure S1. PXRD patterns of complex (1).

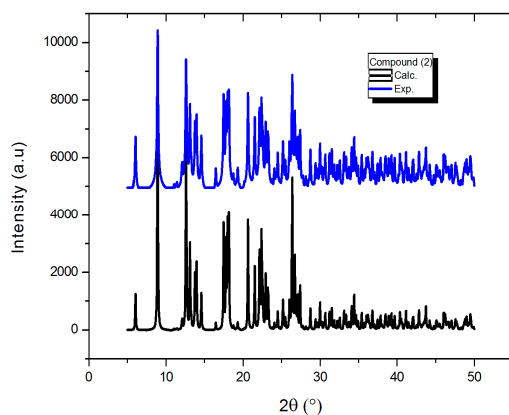

Figure S2. PXRD patterns of complex (2).

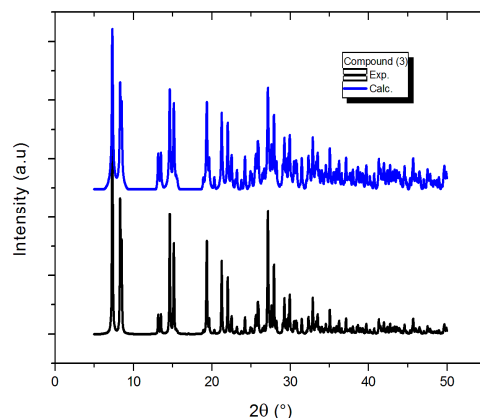

Figure S3. PXRD patterns of complex (3).

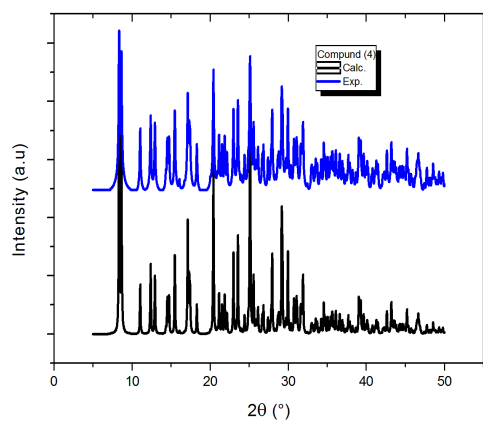

Figure S4. PXRD patterns of complex (4).

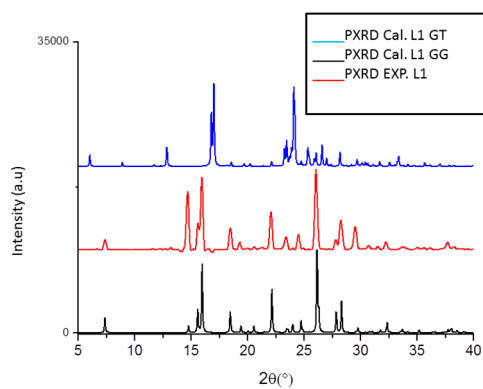

Figure S5. PXRD patterns of L1 bulk.

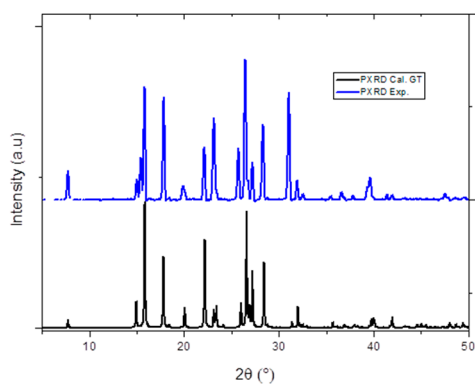

Figure S6. PXRD patterns of L2 bulk.

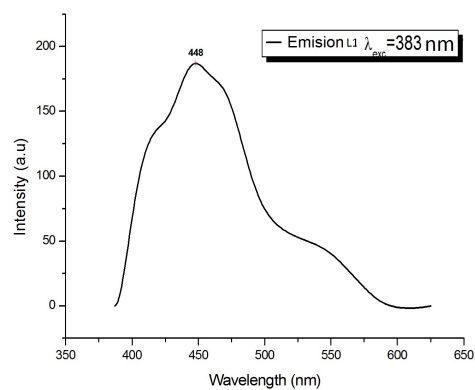

Figure S7. Emission spectra of L1  $E_{exc} = 383$  nm.

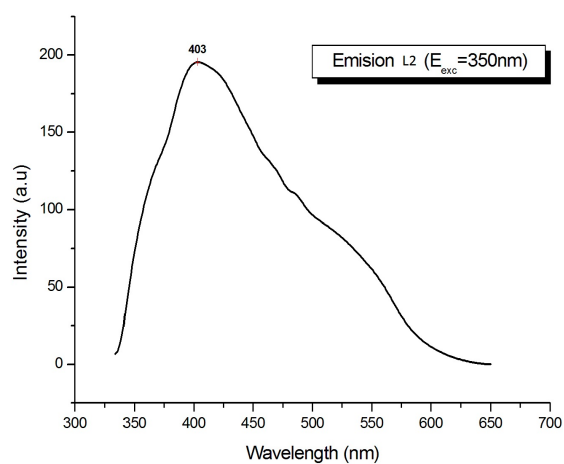

**Figure S8.** Emission spectra of L2  $E_{exc} = 350$  nm.

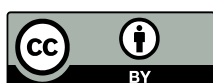

© 2016 by the authors; licensee MDPI, Basel, Switzerland. This article is an open access article distributed under the terms and conditions of the Creative Commons by Attribution (CC-BY) license (<http://creativecommons.org/licenses/by/4.0/>).
